# Supplementary material for: Review article: Melt-affected ice cores for polar research in a warming world
Source: Copernicus journal article supplement (doi:10.5194/tc-18-2691-2024), 2024-06-11
Supplement: Supplementary file 1 [file tc-18-2691-2024-supplement.pdf]

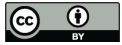

*Supplement of*

## **Review article: Melt-affected ice cores for polar research in a warming world**

**Dorothea Elisabeth Moser et al.**

*Correspondence to:* Dorothea Elisabeth Moser (moser@bas.ac.uk)

The copyright of individual parts of the supplement might differ from the article licence.

*Supplementary Material.*

**Table S1.** Three example calculations of melt frequency and melt feature percentage in an exemplary 50-cm annual layer. Though the total thickness of melt layers is equal in A and B, melt frequency differs, and despite A and C exhibiting the same melt frequency, the melt feature percentage varies. These example results show how the two approaches highlight different aspects of melt intensity within a profile, i.e. melt frequency and thickness-derived melt-affected mass.

| Example profile | Number of melt layers in 50-cm annual layer | Total thickness of melt layers (cm) | Melt frequency ( $\text{a}^{-1}$ ) | Melt feature percentage (%) |
|-----------------|---------------------------------------------|-------------------------------------|------------------------------------|-----------------------------|
| A               | 3                                           | 5                                   | <b>3</b>                           | <b>10</b>                   |
| B               | 1                                           | 5                                   | <b>1</b>                           | <b>10</b>                   |
| C               | 3                                           | 2                                   | <b>3</b>                           | <b>4</b>                    |
